# Supplementary material for: Effect of sequence distribution of block copolymers on the interfacial properties of ternary mixtures: a dissipative particle dynamics simulation
Source: Royal Society of Chemistry journal article supplement (doi:10.1039/d1ra08936f), 2022-01-01
Supplement: d1ra08936f1.pdf [file d1ra08936f1.pdf]

ARTICLE

## Effect of sequence distribution of block copolymer on the interfacial properties of ternary mixtures: A dissipative particle dynamics simulation

Dongmei Liu,<sup>1</sup> Ye Lin,<sup>\*1</sup> Huifeng Bo,<sup>1</sup> Deyang Li,<sup>1</sup> Kai Gong,<sup>1</sup> Zhanxin Zhang,<sup>1</sup> and Sijia Li,<sup>\*2</sup>

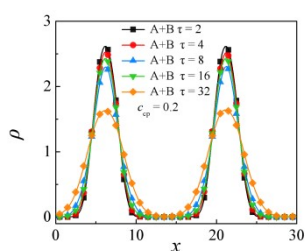

**Figure S1** Density profiles of beads A+B of copolymer along the x-axis at  $N_{cp} = 32$ ,  $c_{cp} = 0.2$ .
